# Supplementary material for: Light-induced LLPS of the CRY2/SPA1/FIO1 complex regulating mRNA methylation and chlorophyll homeostasis in Arabidopsis
Source: Springer Nature journal article supplement (doi:10.1038/s41477-023-01580-0), 2023-12-08

Fig. 3a

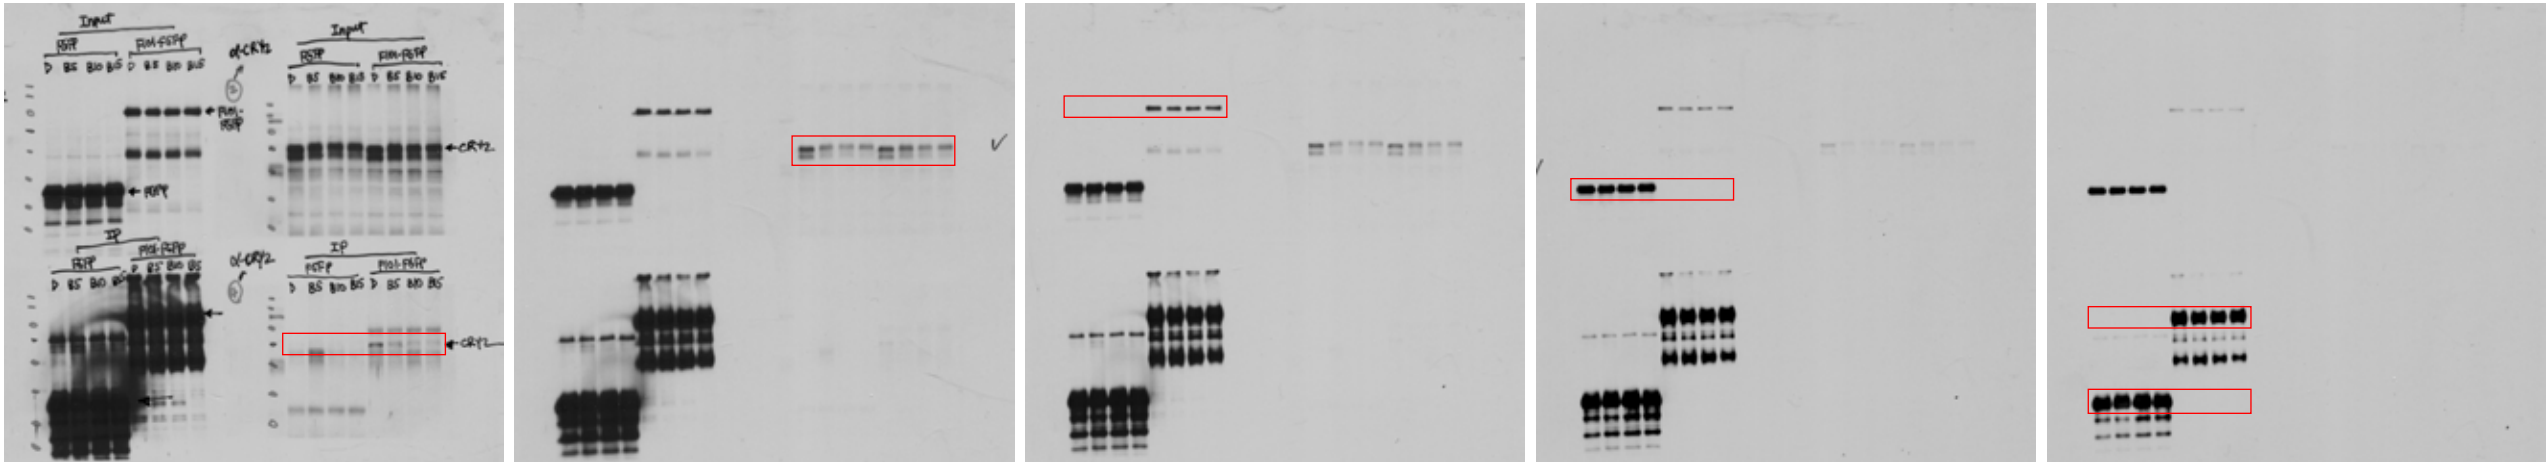

Fig. 3b

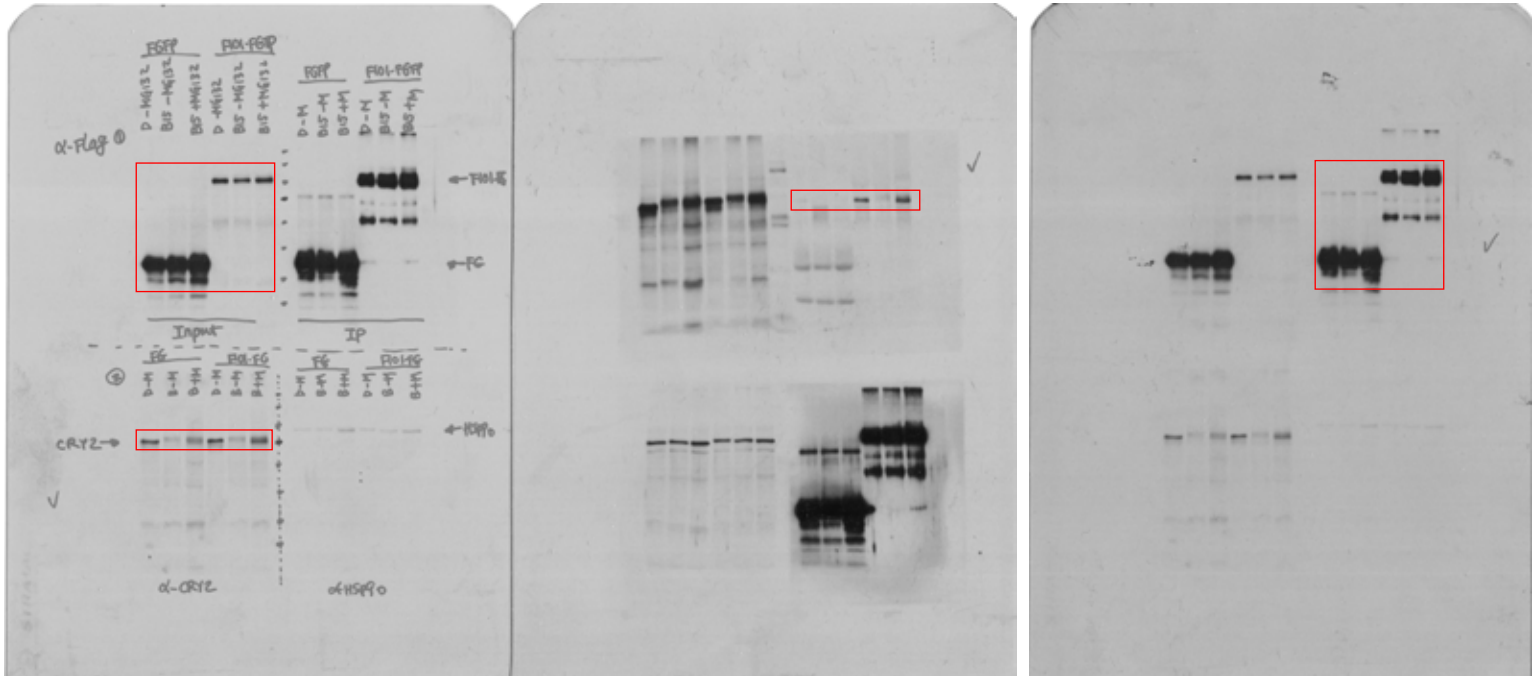

Fig. 3d

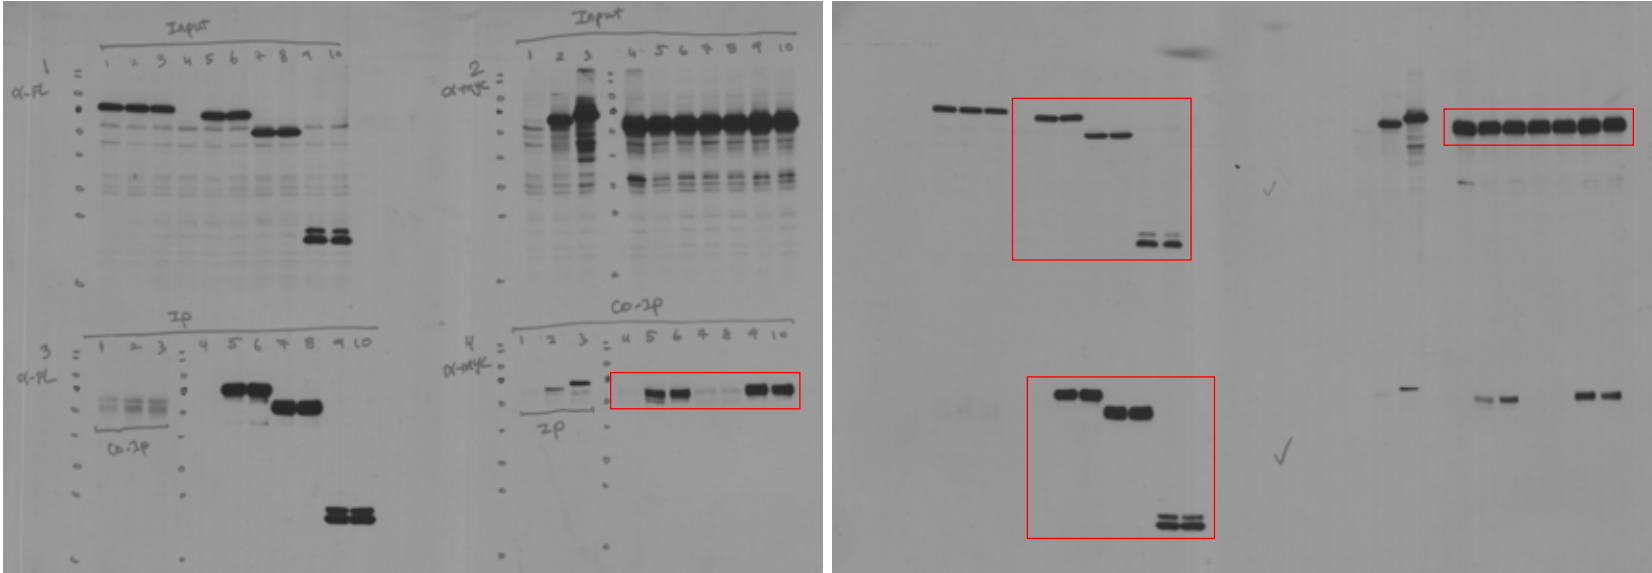

Fig. 3e

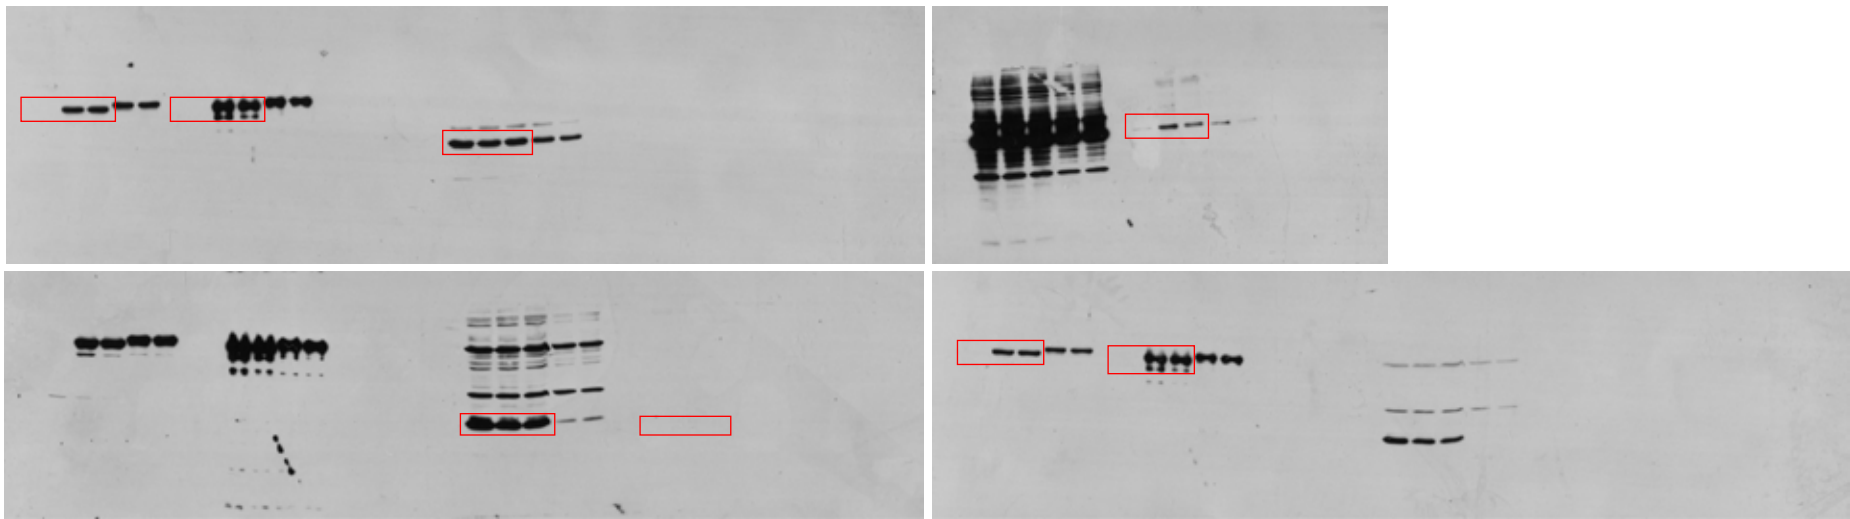

Fig. 3g

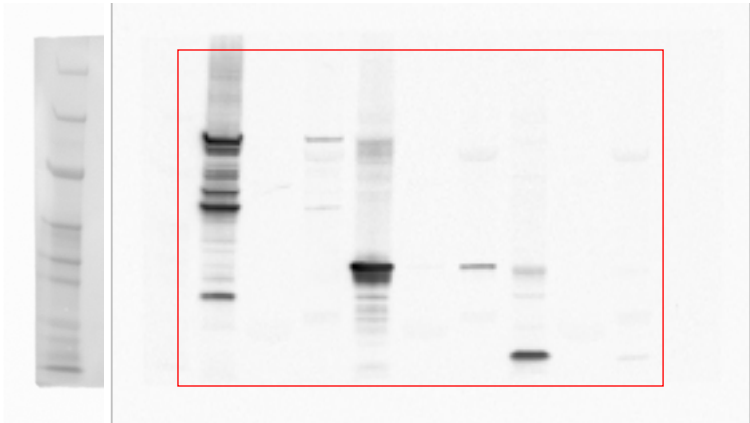

Supplement: MOESM3 [file 41477_2023_1580_MOESM3_ESM.pdf › 41477_2023_1580_MOESM3_ESM.pdf]
