# Supplementary material for: Light-induced LLPS of the CRY2/SPA1/FIO1 complex regulating mRNA methylation and chlorophyll homeostasis in Arabidopsis
Source: Springer Nature journal article supplement (doi:10.1038/s41477-023-01580-0), 2023-12-08

Extended Fig.1c-d

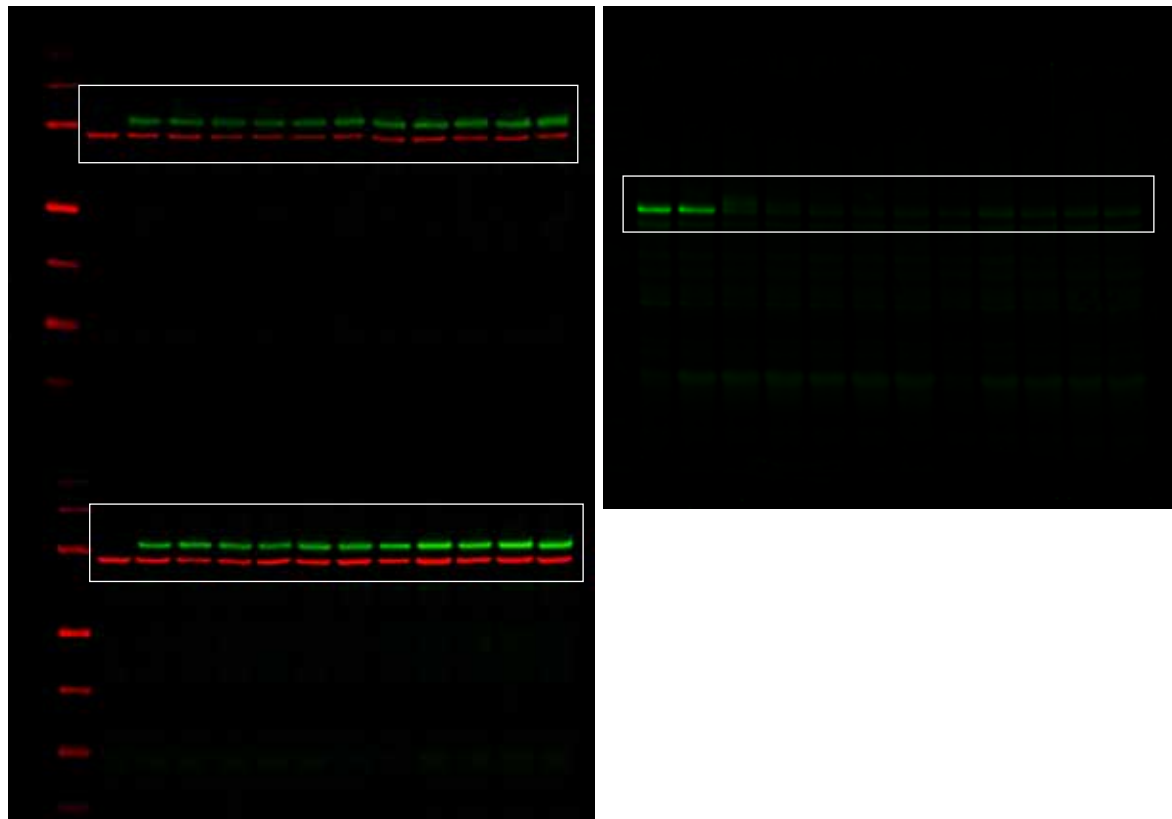

Extended Fig.1e

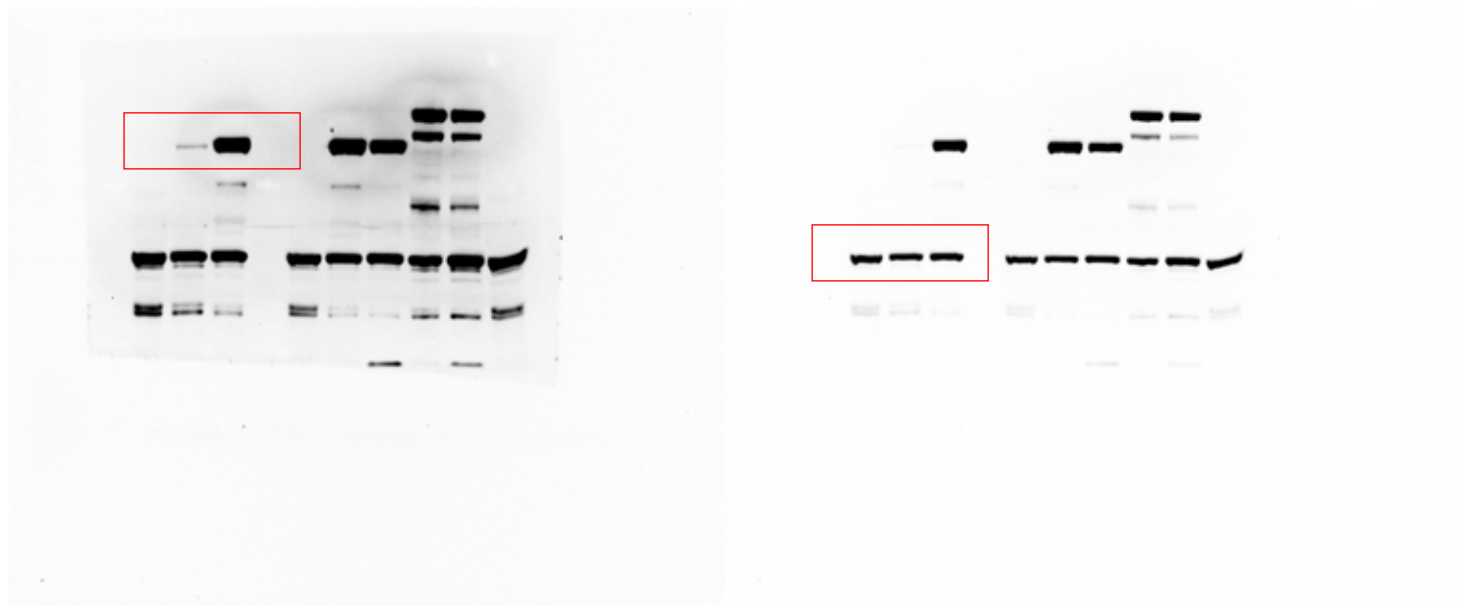

Supplement: MOESM4 [file 41477_2023_1580_MOESM4_ESM.pdf › 41477_2023_1580_MOESM4_ESM.pdf]
