# Supplementary material for: Light-induced LLPS of the CRY2/SPA1/FIO1 complex regulating mRNA methylation and chlorophyll homeostasis in Arabidopsis
Source: Springer Nature journal article supplement (doi:10.1038/s41477-023-01580-0), 2023-12-08
Supplement: MOESM5 [file 41477_2023_1580_MOESM5_ESM.pdf › 41477_2023_1580_MOESM5_ESM.pdf]

Figure 1: Western blot analysis of p53 and p21 expression. The figure shows three Western blot panels. The top panel shows p53 expression, with lanes 1-4 showing strong bands and lanes 5-8 showing no bands. The middle panel shows p21 expression, with lanes 1-4 showing strong bands and lanes 5-8 showing no bands. The bottom panel shows p53 expression, with lanes 1-4 showing strong bands and lanes 5-8 showing no bands. Red boxes highlight the p53 and p21 bands in the middle and bottom panels.

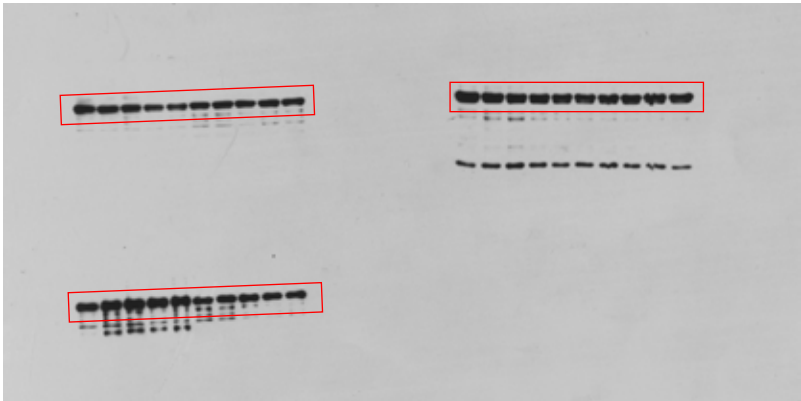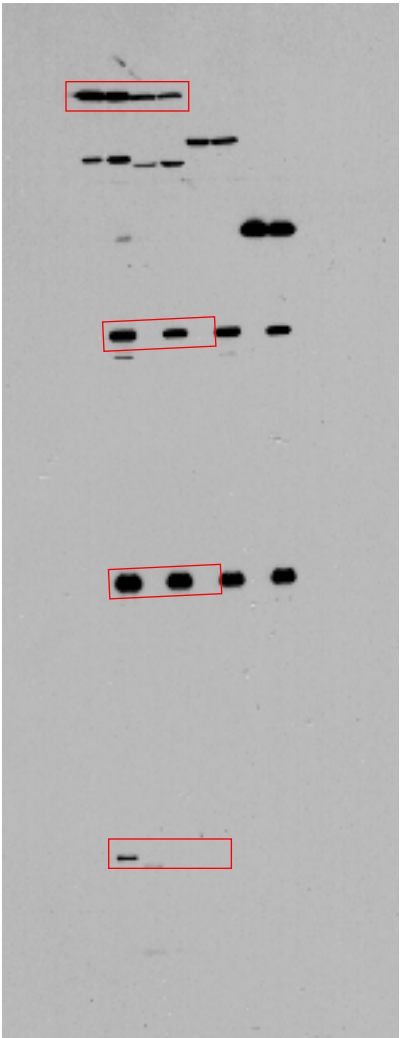

Extended Fig. 4g

The image displays two panels of gel electrophoresis results. The top panel shows a gel with two lanes. The right lane has a red box highlighting a specific band. The bottom panel shows a larger gel with multiple lanes, also with a red box highlighting a specific band.
